# Supplementary material
Source: Springer Nature journal article supplement (https://www.springermedizin.de/resource/supplementary/12968_2011_2032_MOESM3_ESM.pdf/9581188)

FR 67Hz  
13cm

M3

2D  
72%  
C 50  
P Low  
HGen

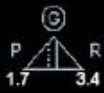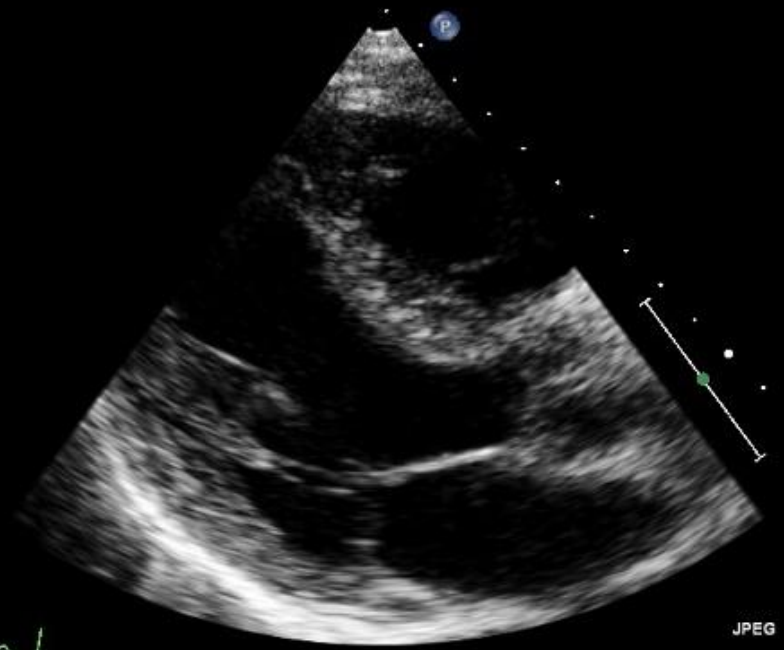

JPEG

73 bpm

A

PHILIPS

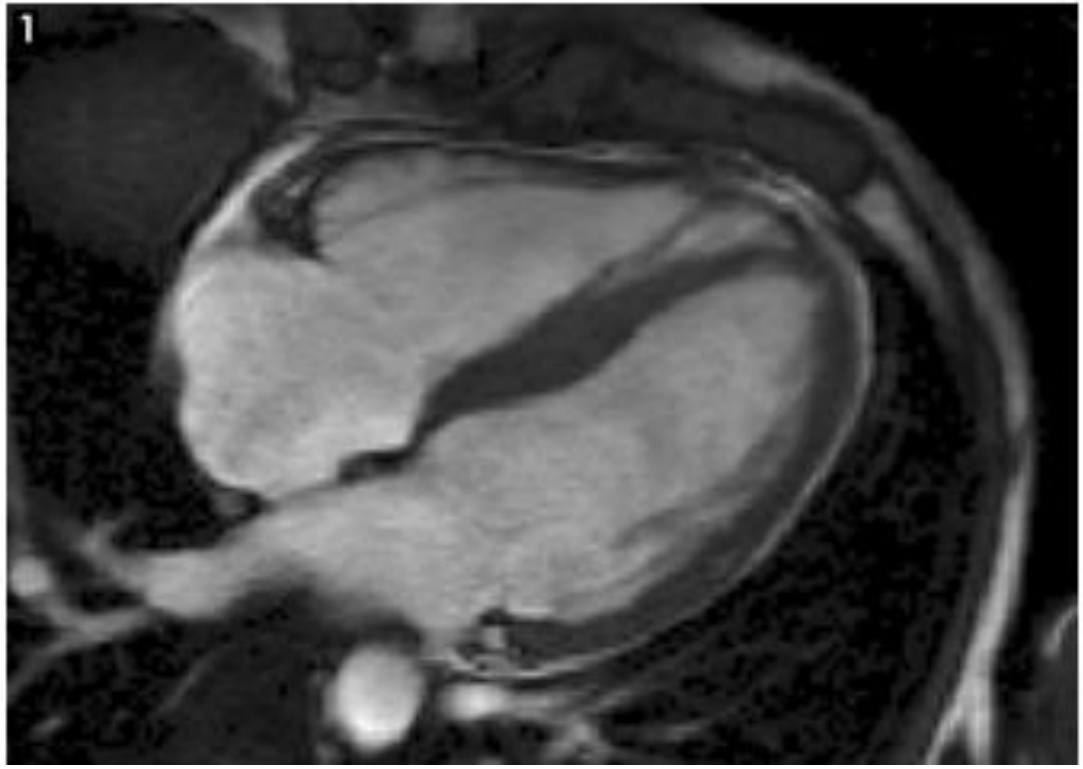

B

Supplement: MOESM3 [file 9581188]
